# Supplementary material
Source: PubMed Central journal article supplement (PMC5580353)
Supplement: NIHMS886781-supplement.pdf [file NIHMS886781-supplement.pdf]

Ma et al., Supplemental Figure 1

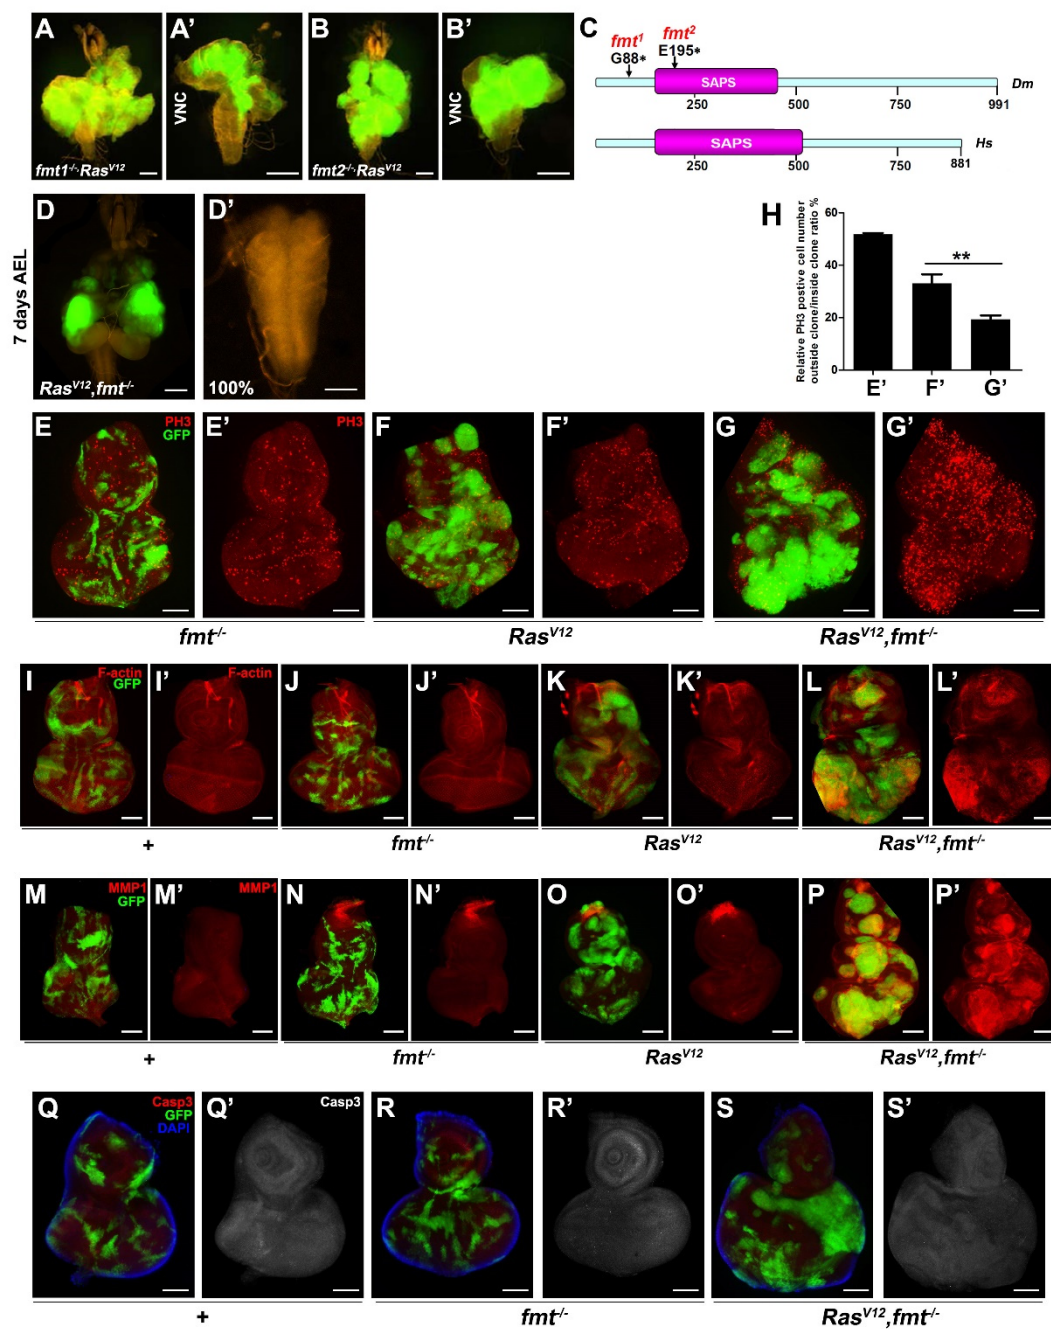

**Figure S1. Loss of Fmt synergizes with  $Ras^{V12}$  to induce tumorigenesis. Related to Figure 1.**

(A-B) Two different *fmt* mutant alleles showed synergy effect with  $Ras^{V12}$ .

(C) Schematic diagram of the *Drosophila* Fmt protein (top; *Dm*) and its human ortholog PPP6R1 (bottom; *Hs*). Two *fmt* alleles both harbor (*fmt*<sup>1</sup>, *fmt*<sup>2</sup>) a nonsense mutation that changes a codon into a stop codon. The conserved SAPS domain is indicated.

(D) 7 days AEL, the  $Ras^{V12}/fmt^{-}$  clones hyper-proliferate extensively, but no invasion observed.

(E-R) Fluorescence micrographs of eye discs are shown. Loss of Fmt collaborates with  $Ras^{V12}$  to induce cell autonomous proliferation (E-G), F-actin accumulation (I-L), MMP1 activation (M-P),

but not apoptosis (Q-S). (H) Quantification of relative PH3 positive cells in E-G.  $**P < 0.01$  (mean + SEM, n=3). Scale bars, 200  $\mu\text{m}$  in (A, A', B, B', D), 100  $\mu\text{m}$  in (D', E-S').

**Genotypes:**

(A) *ey-Flp1/+; Act>y+>Gal4, UAS-GFP/UAS-Ras<sup>V12</sup>; tub-Gal80, FRT79E/fmt<sup>1</sup>, FRT79E*  
 (B) *ey-Flp1/+; Act>y+>Gal4, UAS-GFP/UAS-Ras<sup>V12</sup>; tub-Gal80, FRT79E/fmt<sup>3</sup>, FRT79E*  
 (E, J, N, R) *ey-Flp1/+; Act>y+>Gal4, UAS-GFP/+; tub-Gal80, FRT79E/fmt<sup>1</sup>, FRT79E*  
 (F, K, O) *ey-Flp1/+; Act>y+>Gal4, UAS-GFP/UAS-Ras<sup>V12</sup>; tub-Gal80, FRT79E/FRT79E*  
 (D, G, L, P, S) *ey-Flp1/+; Act>y+>Gal4, UAS-GFP/UAS-Ras<sup>V12</sup>; tub-Gal80, FRT79E/fmt<sup>1</sup>, FRT79E*  
 (I, M, Q) *ey-Flp1/+; Act>y+>Gal4, UAS-GFP/+; tub-Gal80, FRT79E/FRT79E*

**Ma et al., Supplemental Figure 2**

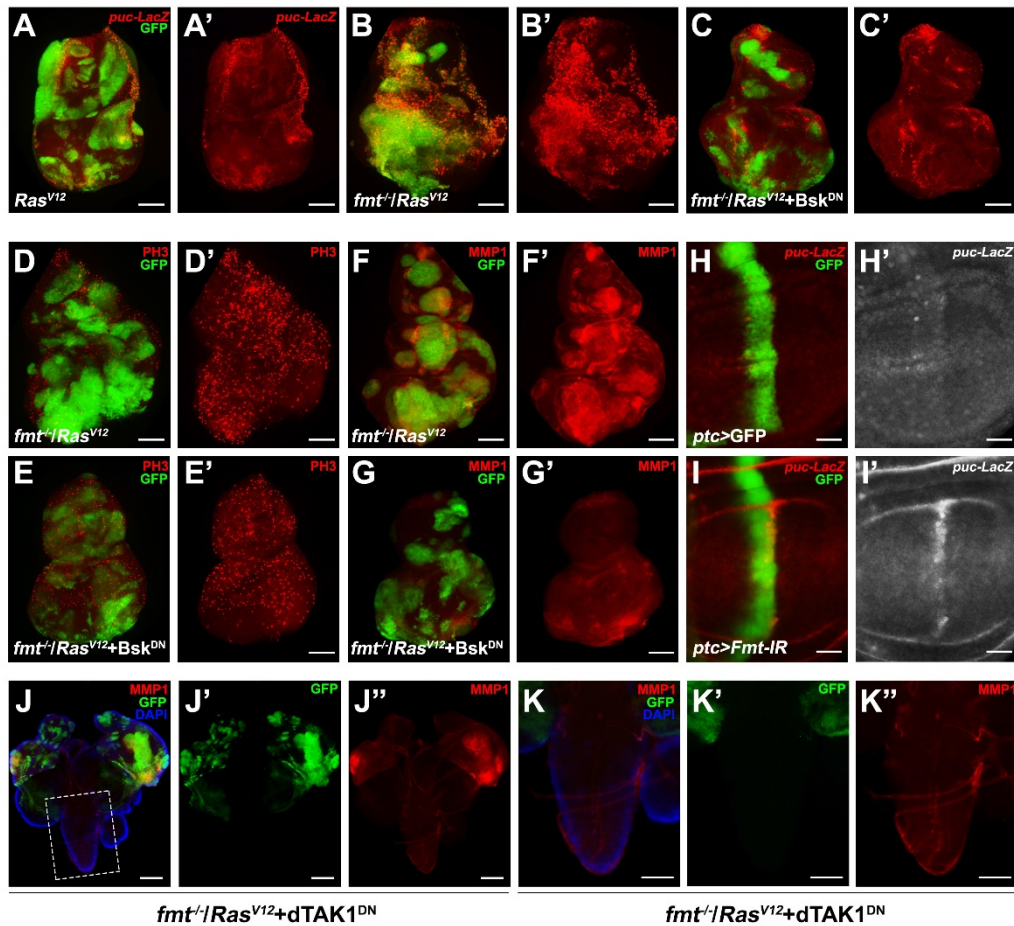

**Figure S2. dTAK1-JNK signal is essential for *Ras<sup>V12</sup>/fmt<sup>-/-</sup>* induced tumorigenesis. Related to Figure 2.**

(A-C) *Ras<sup>V12</sup>* expression induced mild JNK activation (A) was synergistically enhanced by loss of *fmt* (B), which can be strongly suppressed by inhibiting JNK signaling (C), it is noteworthy that weak non-autonomous JNK activation appeared in surrounding clones.

(D-G)  $Ras^{V12}/fmt^{-/-}$  induced proliferation (D) and MMP1 induction (F) was completely impeded by expression of Bsk<sup>DN</sup> (E, G).

(H-I) Compared with controls (H'), inhibition of Fmt under *ptc* promoter mildly activate JNK signal (I'), crosses were done at 29 °C.

(J-K) Inhibition of dTAK1 activity significantly suppressed  $Ras^{V12}/fmt^{-/-}$  induced tumor overgrowth and invasion. Scale bars, 100  $\mu$ m in (A-G, K-K'), 200  $\mu$ m in (H-I', J-J').

**Genotypes:**

(A) *ey-Flp1/+; Act>y<sup>+</sup>>Gal4, UAS-GFP/UAS-Ras<sup>V12</sup>; tub-Gal80, FRT79E/FRT79E*

(B, D, F) *ey-Flp1/+; Act>y<sup>+</sup>>Gal4, UAS-GFP/UAS-Ras<sup>V12</sup>; tub-Gal80, FRT79E/fmt<sup>l</sup>, FRT79E*

(C, E, G) *ey-Flp1/UAS-Bsk<sup>DN</sup>; Act>y<sup>+</sup>>Gal4, UAS-GFP/UAS-Ras<sup>V12</sup>; tub-Gal80, FRT79E/fmt<sup>l</sup>, FRT79E*

(H) *ptc-Gal4, UAS-GFP/+*

(I) *ptc-Gal4, UAS-GFP/UAS-fmt-IR*

(J, K) *ey-Flp1/+; Act>y<sup>+</sup>>Gal4, UAS-GFP/UAS-Ras<sup>V12</sup>, UAS-dTAK1<sup>DN</sup>; tub-Gal80, FRT79E/fmt<sup>l</sup>, FRT79E*

**Ma et al., Supplemental Figure 3**

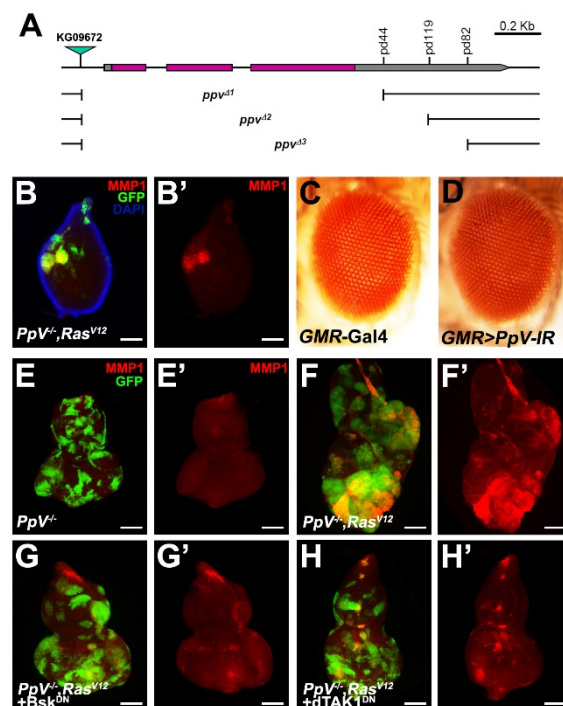

**Figure S3. dTAK1-JNK signal is essential for  $Ras^{V12}/fmt^{-/-}$  induced tumorigenesis. Related to Figure 3.**

(B)  $PpV^{-/-}/Ras^{V12}$  tumors cause metastasize to leg disc.

(C-D) Loss of *PpV* itself under *GMR* promoter produced no obvious eye phenotype.

(E-H) *PpV<sup>-/-</sup>/Ras<sup>V12</sup>* induced tumor growth and MMP1 induction (F) was strongly suppressed by blocking JNK (G) or dTAK1 activity (H). Scale bars, 50  $\mu$ m in (B-B'), 100  $\mu$ m in (E-H').

**Genotypes:**

(B, F) *PpV<sup>Δ1</sup>*, FRT19A/*tub-Gal80*, FRT19A; *ey-Flp5*, *Act>y<sup>+</sup>>Gal4*, *UAS-GFP/UAS-Ras<sup>V12</sup>*

(C) *GMR-Gal4*

(D) *GMR-Gal4/+*; *UAS-PpV-IR/+*

(E) *PpV<sup>Δ1</sup>*, FRT19A/*tub-Gal80*, FRT19A; *ey-Flp5*, *Act>y<sup>+</sup>>Gal4*, *UAS-GFP/+*

(G) *PpV<sup>Δ1</sup>*, FRT19A/*tub-Gal80*, FRT19A; *ey-Flp5*, *Act>y<sup>+</sup>>Gal4*, *UAS-GFP/UAS-Ras<sup>V12</sup>*; *UAS-Bsk<sup>DN/+</sup>*

(H) *PpV<sup>Δ1</sup>*, FRT19A/*tub-Gal80*, FRT19A; *ey-Flp5*, *Act>y<sup>+</sup>>Gal4*, *UAS-GFP/UAS-Ras<sup>V12</sup>*, *UAS-dTAK1<sup>DN</sup>*

**Ma et al., Supplemental Figure 4**

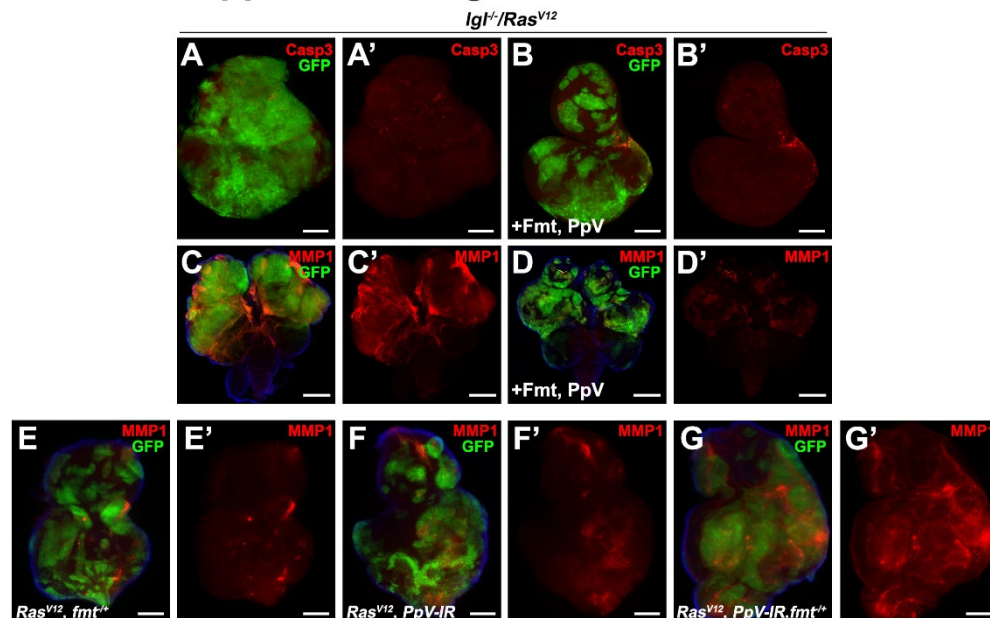

**Figure S4. Fmt and PpV expression suppress *Igl-Ras* induced tumorigenesis. Related to Figure 4.**

(A-B) Caspase 3 activation in *Igl<sup>-/-</sup>/Ras<sup>V12</sup>* tumors (A') was not significantly affected by Fmt/PpV expression (B'), note that weak non-autonomous apoptosis was observed around some small clones (indicated by white arrow).

(C-D) Fmt/PpV expression significantly suppressed *Igl-Ras*-induced MMP1 activation.

(E-G) Removing one copy of *fmt* synergistically enhanced *Ras<sup>V12</sup>,PpV-IR* induced tumor overgrowth and MMP1 activation. Scale bars, 100  $\mu$ m in (A-B', E-G'), 200  $\mu$ m in (C-D').

**Genotypes:**

(A, C) *ey-Flp1/+; tub-Gal80, FRT40A/Igl<sup>Δ</sup>, FRT40A, UAS-Ras<sup>V12</sup>; Act>y<sup>+</sup>>Gal4, UAS-GFP/+*

(B, D) *ey-Flp1/+; tub-Gal80, FRT40A/Igl<sup>Δ</sup>, FRT40A, UAS-Ras<sup>V12</sup>; Act>y<sup>+</sup>>Gal4, UAS-GFP/UAS-Fmt, UAS-PpV*

(E) *ey-Flp1/+; tub-Gal80, FRT40A/FRT40A, UAS-Ras<sup>V12</sup>; fmt<sup>l</sup>, FRT79E/Act>y<sup>+</sup>>Gal4, UAS-GFP*

(F) *ey-Flp1/+; tub-Gal80, FRT40A/FRT40A, UAS-Ras<sup>V12</sup>; UAS-PpV-IR/Act>y<sup>+</sup>>Gal4, UAS-GFP*

(G) *ey-Flp1/+; tub-Gal80, FRT40A/FRT40A, UAS-Ras<sup>V12</sup>; UAS-PpV-IR, fmt<sup>l</sup>, FRT79E/Act>y<sup>+</sup>>Gal4, UAS-GFP*
